# Supplementary material for: Genetic Variability in Balkan Paleoendemic Resurrection Plants Ramonda serbica and R. nathaliae Across Their Range and in the Zone of Sympatry
Source: Frontiers journal article supplement (doi:10.3389/fpls.2022.873471), 2022-04-28

### Supplementary Figure 1.

Dendrogram built on inter-population DAS genetic distance using *R. serbica* and *R. nathaliae* populations from the large geographical scale study. Reliability of nodes (in %) were computed on the basis of 1000 bootstrap on locus.

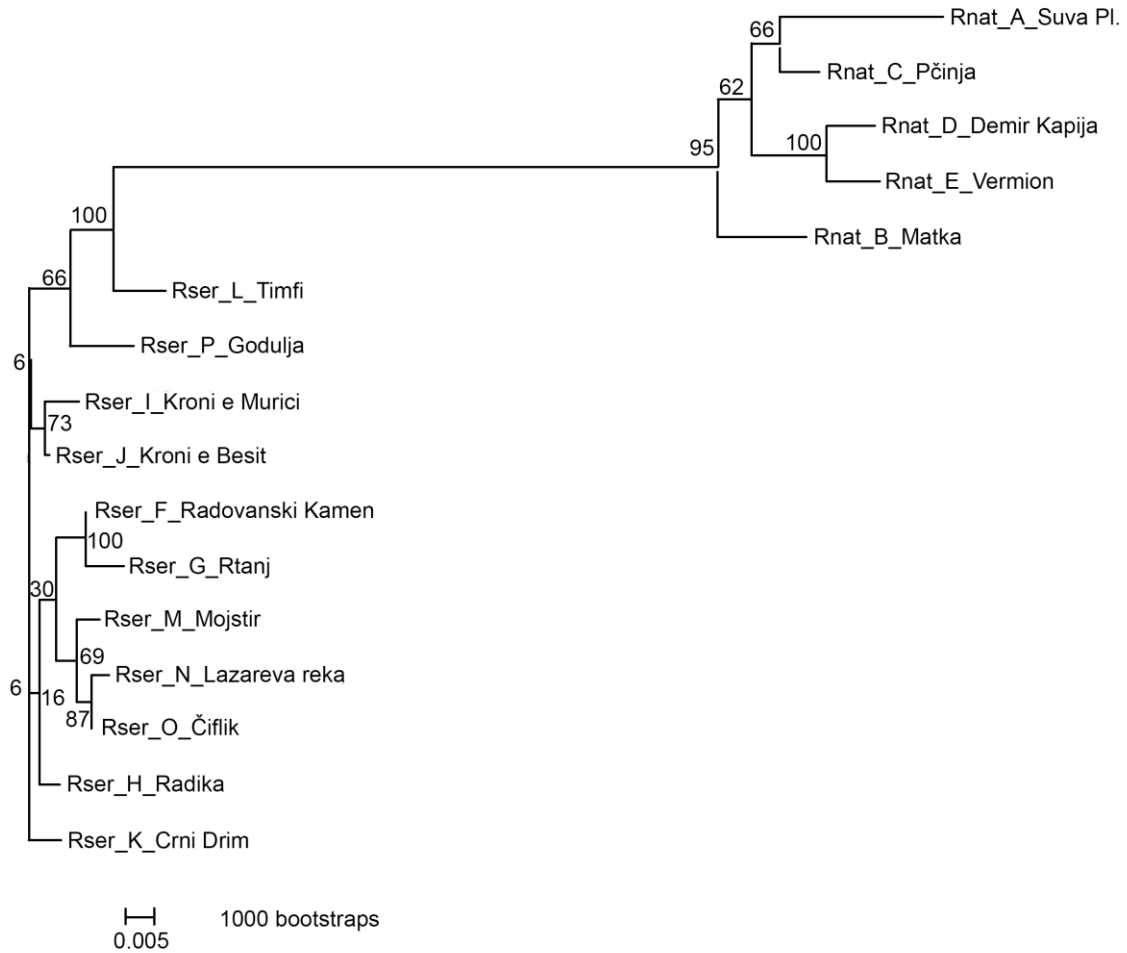

Supplement: Data_Sheet_1.PDF [file Data_Sheet_1.PDF]
