# Supplementary material for: Genetic Variability in Balkan Paleoendemic Resurrection Plants Ramonda serbica and R. nathaliae Across Their Range and in the Zone of Sympatry
Source: Frontiers journal article supplement (doi:10.3389/fpls.2022.873471), 2022-04-28

**Supplementary Figure 2.** Histogram of assignments of individuals to monospecific populations of *R. nathaliae* and *R. serbica*. Population codes the same as in Table 1. The assignment posterior probability (expressed in %) is given in brackets for each population.

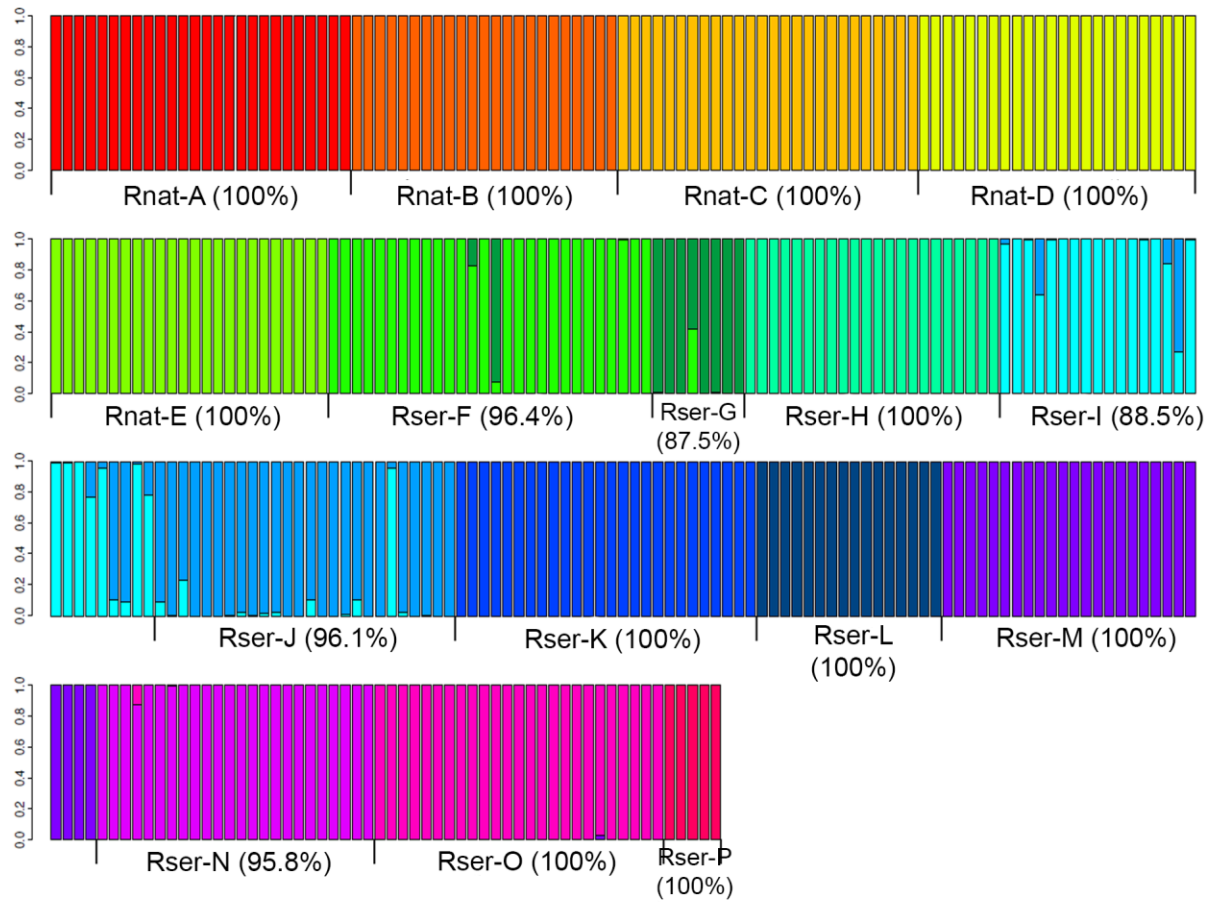

Supplement: Data_Sheet_2.PDF [file Data_Sheet_2.PDF]
