# Supplementary material for: Genetic Variability in Balkan Paleoendemic Resurrection Plants Ramonda serbica and R. nathaliae Across Their Range and in the Zone of Sympatry
Source: Frontiers journal article supplement (doi:10.3389/fpls.2022.873471), 2022-04-28

#### Supplementary Figure 4.

Results from the Evanno test showing the best clustering solution was obtained for  $K=2$ , according to the  $\Delta K$  criteria.

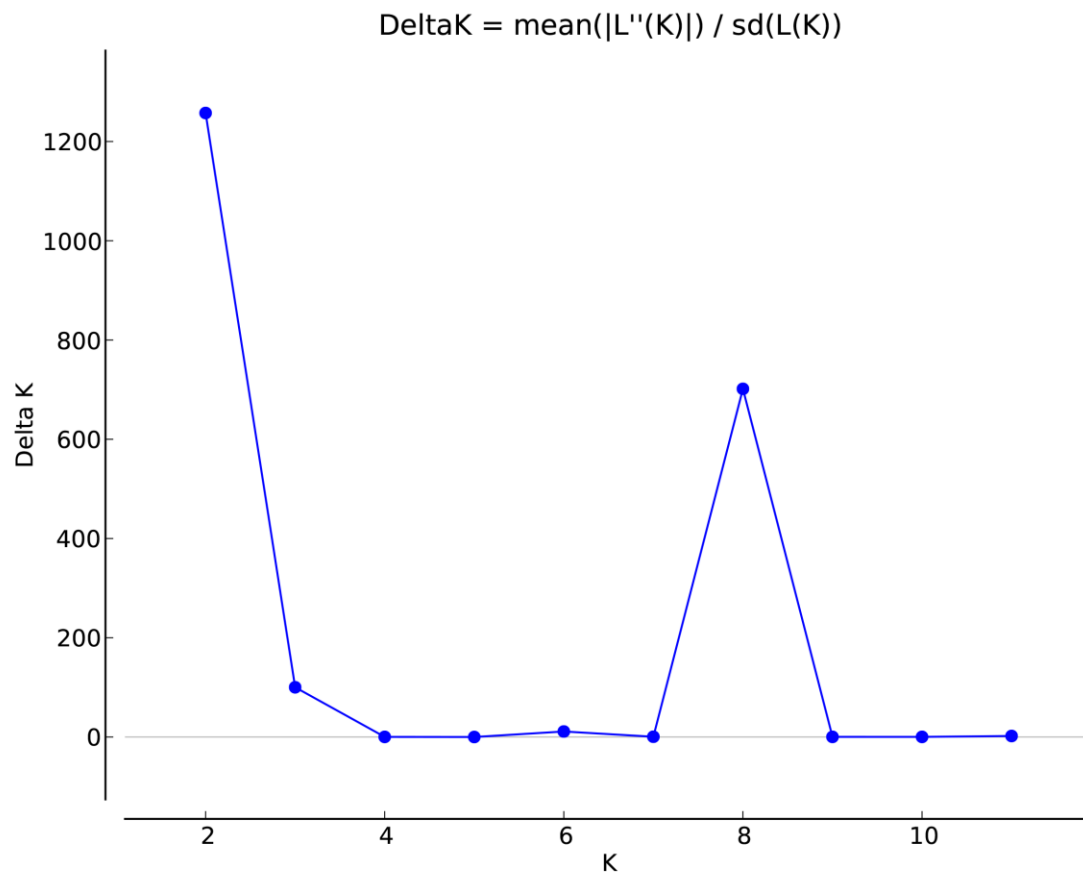

Supplement: Data_Sheet_4.PDF [file Data_Sheet_4.PDF]
