# Supplementary material for: Genetic Variability in Balkan Paleoendemic Resurrection Plants Ramonda serbica and R. nathaliae Across Their Range and in the Zone of Sympatry
Source: Frontiers journal article supplement (doi:10.3389/fpls.2022.873471), 2022-04-28

### Supplementary Figure 6.

Bayesian Criteria Indices (BIC) for DAPC analysis on monospecific populations and populations in sympatry. A clear plate is reached at  $K=3$ .

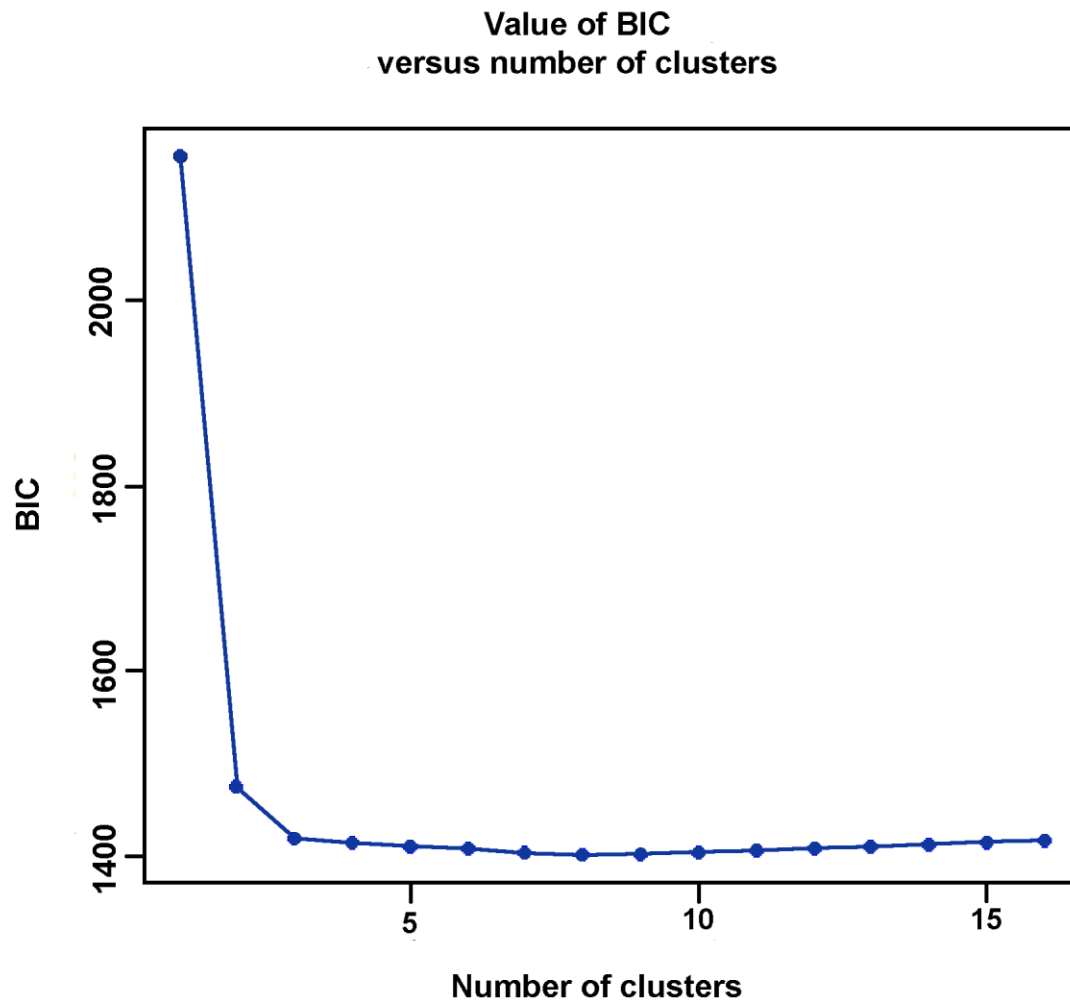

Supplement: Data_Sheet_6.pdf [file Data_Sheet_6.pdf]
