# Supplementary material for: Genetic Variability in Balkan Paleoendemic Resurrection Plants Ramonda serbica and R. nathaliae Across Their Range and in the Zone of Sympatry
Source: Frontiers journal article supplement (doi:10.3389/fpls.2022.873471), 2022-04-28
Supplement: Data_Sheet_9.PDF [file Data_Sheet_9.PDF]

**Supplementary Table 2.** AMOVA results performed for two species together, as well as for every species separately.

|                                 | <i>R. nathaliae</i> +<br><i>R. serbica</i> | <i>R. nathaliae</i> | <i>R. serbica</i> |
|---------------------------------|--------------------------------------------|---------------------|-------------------|
| Source of variation             | Variation (%)                              |                     |                   |
| Among groups                    | 48.51                                      |                     |                   |
| Among populations within groups | 9.91                                       | 27.83               | 13.8              |
| Within populations              | 41.58                                      | 72.17               | 86.2              |
| $\Phi_{sc}$                     | 0.193                                      |                     |                   |
| $\Phi_{st}$                     | 0.584                                      | 0.278               | 0.138             |
| $\Phi_{ct}$                     | 0.485                                      |                     |                   |
